# Supplementary material for: Hydroxyl-rich ceria hydrate nanoparticles enhancing the alcohol electrooxidation performance of Pt catalysts
Source: Royal Society of Chemistry journal article supplement (doi:10.1039/c7ta09071d), 2018-01-01
Supplement: c7ta09071d1.pdf [file c7ta09071d1.pdf]

## Electronic Supplementary Information

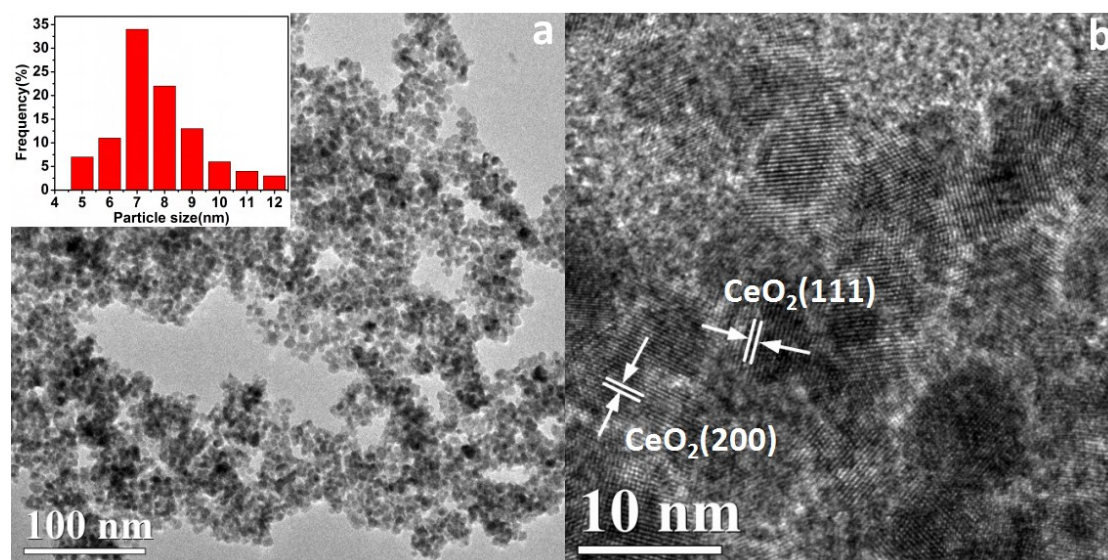

Fig. S1 (a) TEM and (b) HRTEM images of CeO<sub>2</sub> nanoparticles by calcining the CeO<sub>2</sub>·xH<sub>2</sub>O nanoparticles at 400 °C. Inset in FS1(a) is particle size distribution of the CeO<sub>2</sub> nanoparticles.

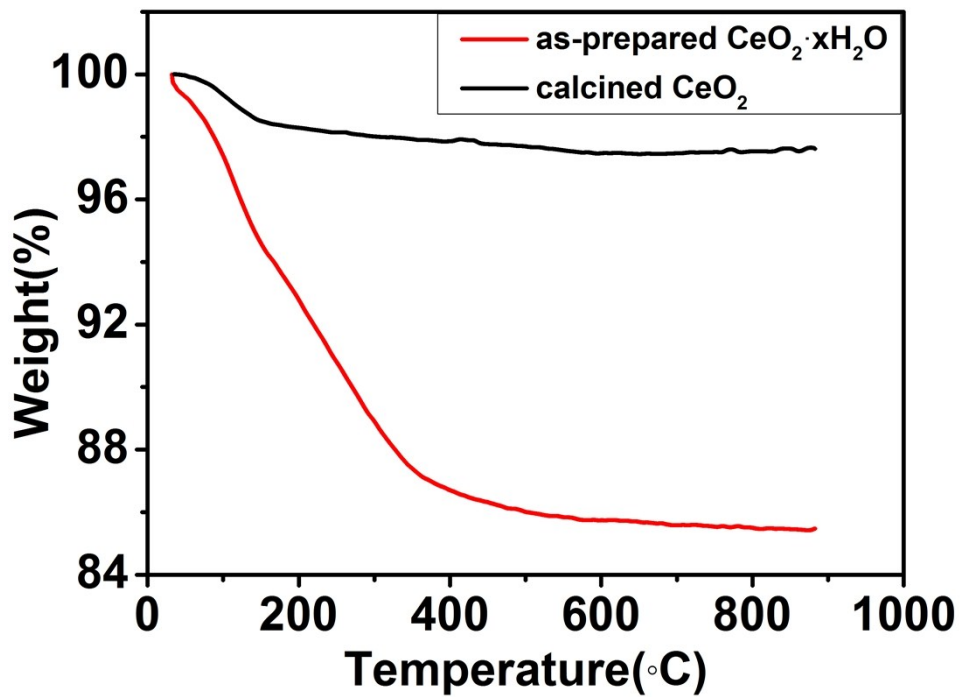

Fig. S2 TGA curves of as-prepared CeO<sub>2</sub>·xH<sub>2</sub>O nanoparticles and calcined CeO<sub>2</sub> nanoparticles.

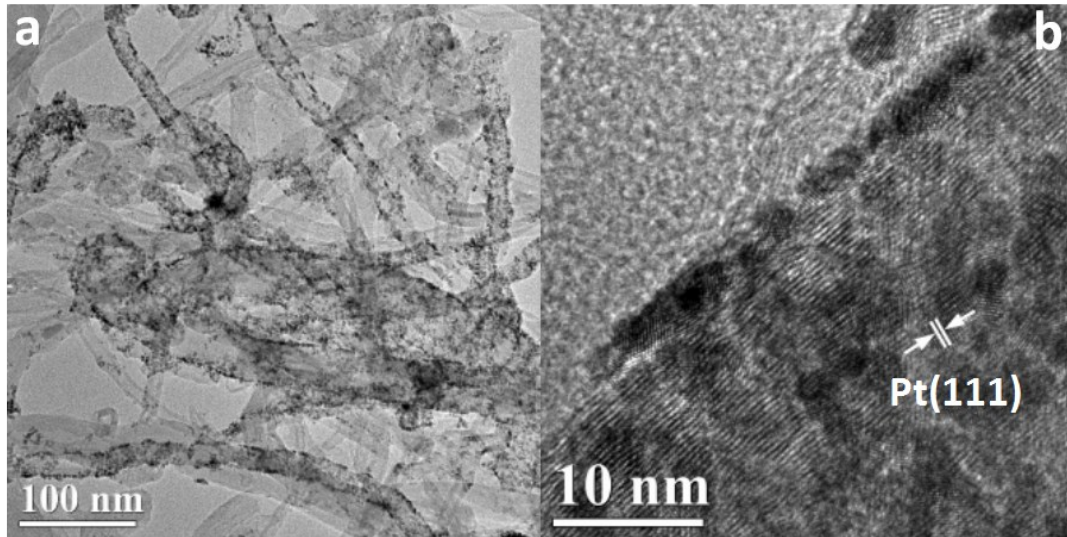

Fig. S3 The TEM and HRTEM images of Pt/CNTs catalyst.

Table S1 Comparison of methanol oxidation behavior in alkaline electrolytes on the various electrocatalysts.

| Catalyst                                                       | Mass / specific activity | ESCA(m <sup>2</sup> /g) | Scan rate (mV/s) | Electrolyte                      | Reference |
|----------------------------------------------------------------|--------------------------|-------------------------|------------------|----------------------------------|-----------|
| Pt/CNTs + CeO <sub>2</sub> ·xH <sub>2</sub> O                  | 2304mA/mg                |                         | 20mV/s           | 1M KOH + 1M CH <sub>3</sub> OH   | This work |
| Pt/Ni(OH) <sub>2</sub> /rGO                                    | 1236mA/mg                | 64.1                    | 20mV/s           | 1M KOH + 1M CH <sub>3</sub> OH   | 1         |
| Pt/CeO <sub>2</sub> /rGO                                       | 1140mA/mg                |                         | 50mV/s           | 1M KOH + 1M CH <sub>3</sub> OH   | 2         |
| Pt/CeO <sub>2</sub> /C                                         | 36mA/cm <sup>2</sup>     |                         | 50mV/s           | 1M KOH + 1M CH <sub>3</sub> OH   | 3         |
| Pt-Mn <sub>3</sub> O <sub>4</sub> -MWCNT                       | 970.2mA/mg               | 64.8m <sup>2</sup> /g   | 50mV/s           |                                  | 4         |
| Pt-TiO <sub>2</sub> /ITO                                       | 1.94mA/cm <sup>2</sup>   |                         | 50mV/s           | 1M KOH + 1M CH <sub>3</sub> OH   | 5         |
| Pt-TiO <sub>2</sub> /RGO                                       | 1.36mA/cm <sup>2</sup>   |                         | 50mV/s           | 0.5M KOH + 1M CH <sub>3</sub> OH | 6         |
| Pd/MnO <sub>2</sub> /graphene                                  | 838mA/mg                 | 82.6m <sup>2</sup> /g   | 50mV/s           | 0.5M KOH + 1M CH <sub>3</sub> OH | 7         |
| Pd-CeO <sub>2</sub> /C                                         | 36.6mA/cm <sup>2</sup>   |                         | 50mV/s           | 1M KOH + 1M CH <sub>3</sub> OH   | 8         |
| Pt/In <sub>0.1</sub> SnO <sub>2</sub>                          | 2320mA/mg                | 43m <sup>2</sup> /g     | 20mV/s           | 0.5M KOH + 2M CH <sub>3</sub> OH | 9         |
| Pt <sub>3.5</sub> Pb                                           | 2840mA/mg                |                         | 50mV/s           | 0.5M KOH + 1M CH <sub>3</sub> OH | 10        |
| porous Pt <sub>1</sub> Cu <sub>3</sub> /1-aminopyrene-graphene | 2750mA/mg                | 76.58m <sup>2</sup> /g  | 50mV/s           | 1M KOH + 0.5M CH <sub>3</sub> OH | 11        |
| Mesoporous Co-Pt films                                         | 4.3 mA/cm <sup>2</sup>   |                         | 50mV/s           | 1M NaOH + 1M CH <sub>3</sub> OH  | 12        |
| PtNi/C                                                         | 1200mA/mg                |                         | 50mV/s           | 1M NaOH + 2M CH <sub>3</sub> OH  | 13        |
| PtAg/C                                                         | 3mA/mg                   | 56m <sup>2</sup> /g     | 20mV/s           | 0.5M KOH + 2M CH <sub>3</sub> OH | 14        |

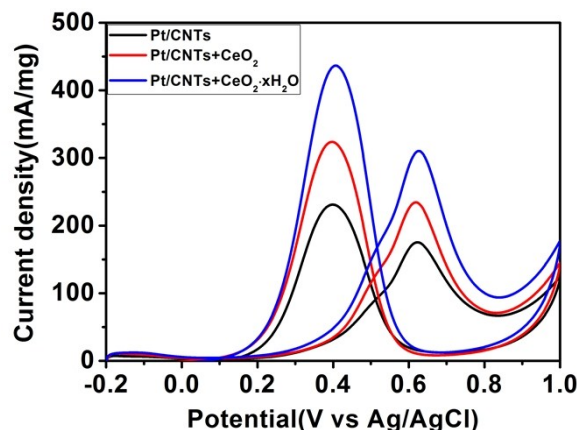

Fig. S4 Cyclic voltammograms curves of Pt/CNTs + CeO<sub>2</sub>·xH<sub>2</sub>O, Pt/CNTs + CeO<sub>2</sub> and Pt/CNTs catalysts in 0.5M H<sub>2</sub>SO<sub>4</sub> and 0.5M CH<sub>3</sub>OH with a scan rate of 20 mV/s.

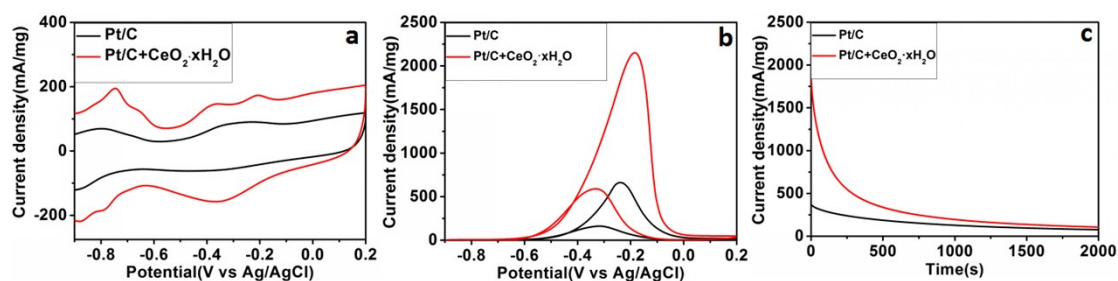

Fig. S5 (a) Cyclic voltammograms curves of methanol electro-oxidation for Pt/C and Pt/C+CeO<sub>2</sub>·xH<sub>2</sub>O in 1M KOH with a scan rate of 200 mV/s. (b) Cycle voltammograms curves of all the catalysts in 1M KOH and 1M CH<sub>3</sub>OH in the potential of -0.9V to 0.2V with a scan rate of 20 mV/s. (c) Chronoamperometric curves of all the catalysts in 1M KOH and 1M CH<sub>3</sub>OH.

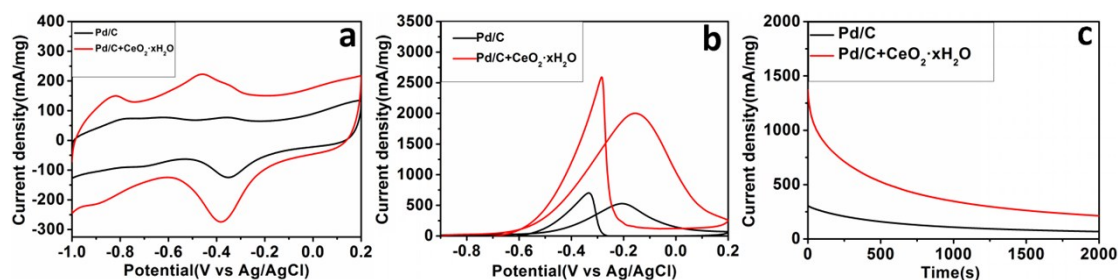

Fig. S6 (a) Cyclic voltammograms curves of methanol electro-oxidation for Pd/C and Pd/C+CeO<sub>2</sub>·xH<sub>2</sub>O on the all catalysts in 1M KOH with a scan rate of 200mV/s. (b) Cycle voltammograms curves of all the catalysts in 1M KOH and 1M CH<sub>3</sub>CH<sub>2</sub>OH in the potential of -0.9V to 0.2V with a scan rate of 20mV/s. (c) Chronoamperometric curves of all the catalysts in 1M KOH and 1M CH<sub>3</sub>CH<sub>2</sub>OH.

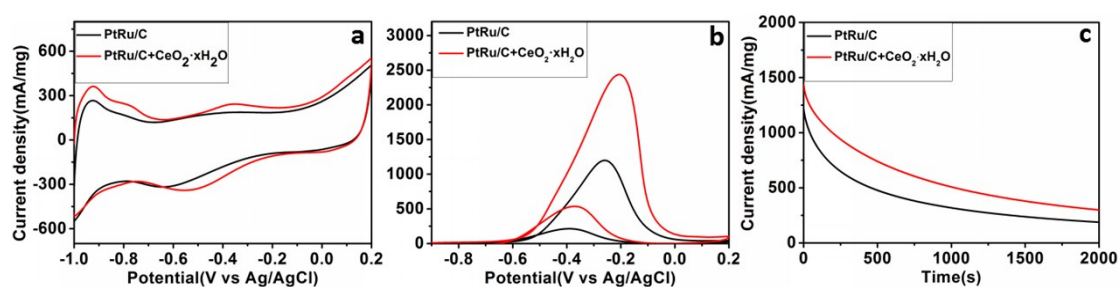

Fig. S7 (a) Cyclic voltammograms of methanol electro-oxidation for PtRu/C and PtRu/C+CeO<sub>2</sub>·xH<sub>2</sub>O catalysts in 1M KOH with a scan rate of 200mV/s. (b) Cycle voltammograms of all the catalysts in 1M KOH and 1M CH<sub>3</sub>OH in the potential of -0.9V to 0.2V with a scan rate of 20mV/s. (c) Chronoamperometric curves of all the catalysts in 1M KOH and 1M CH<sub>3</sub>OH.

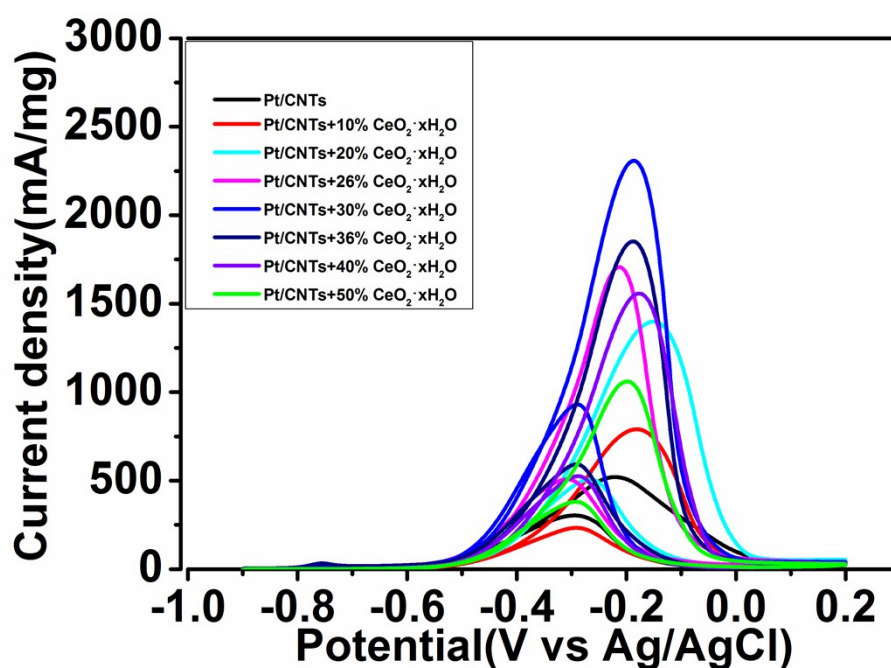

Fig. S8 CVs of methanol electrooxidation in a N<sub>2</sub>-saturated solution of 1.0 M KOH and 1.0 M CH<sub>3</sub>OH on the Pt/CNTs and Pt/CNTs + CeO<sub>2</sub>·xH<sub>2</sub>O catalysts prepared with different ratio of CeO<sub>2</sub>·xH<sub>2</sub>O. The scan rate is 20 mV/s.



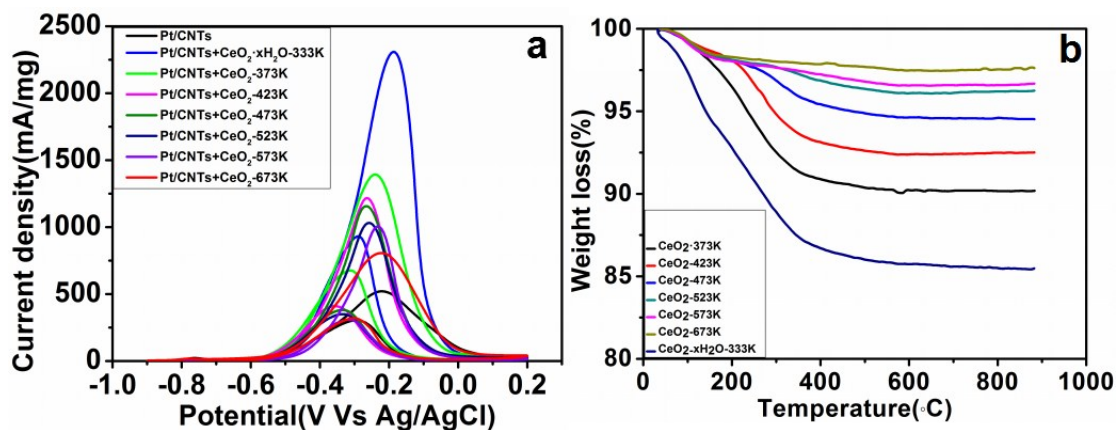

Fig. S9 (a) CVs of Pt/CNTs +  $\text{CeO}_2 \cdot x\text{H}_2\text{O}$  catalysts prepared with distinct  $\text{CeO}_2 \cdot x\text{H}_2\text{O}$  calcined at different temperature. (b) TGA curves of the distinct  $\text{CeO}_2 \cdot x\text{H}_2\text{O}$  nanoparticles.

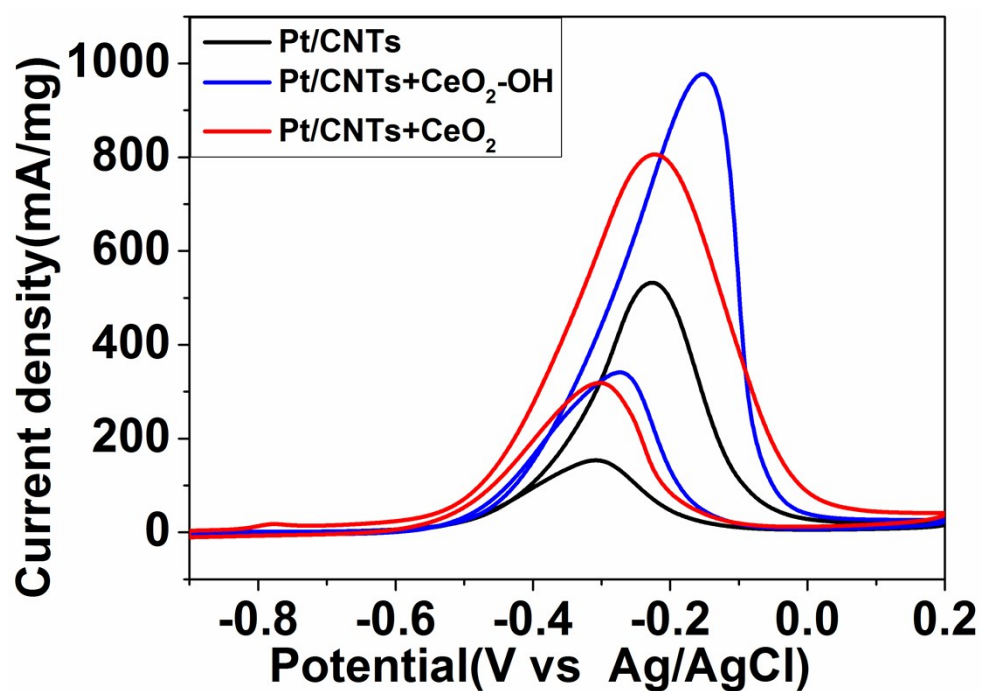

Fig. S10 CVs of Pt/CNTs, Pt/CNTs +  $\text{CeO}_2$ , Pt/CNTs +  $\text{CeO}_2\text{-OH}$  in 1.0 M KOH + 1.0 M  $\text{CH}_3\text{OH}$  with a scan rate of 20 mV/s.  $\text{CeO}_2\text{-OH}$  was obtained by stirring  $\text{CeO}_2$  nanoparticles in 1.0 M NaOH solution for 1 h.

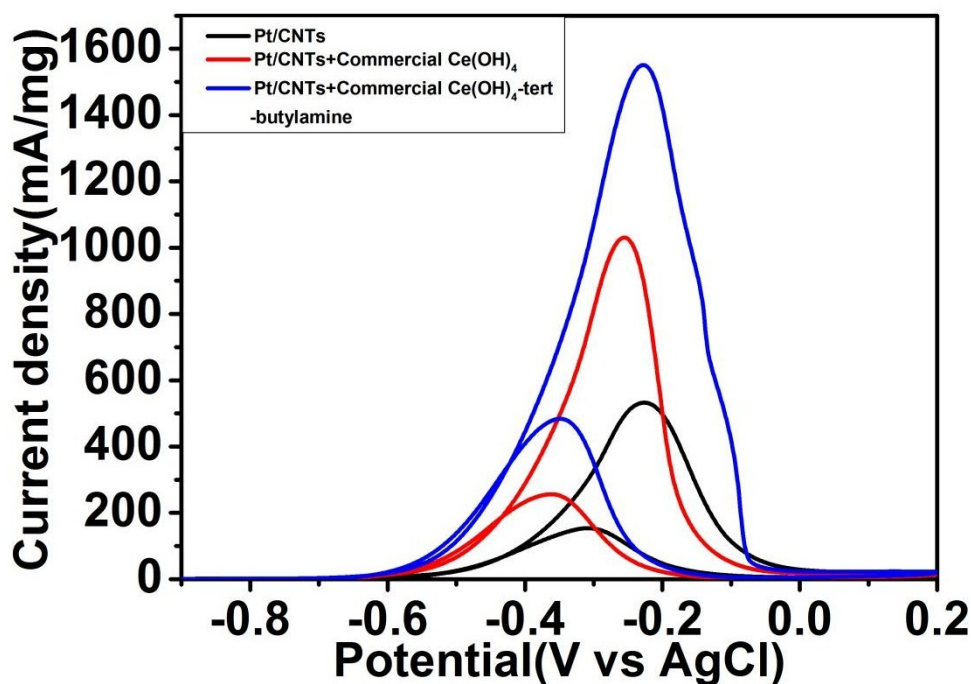

Fig. S11 CVs of Pt/CNTs, Pt/CNTs + commercial  $\text{Ce}(\text{OH})_4$  and Pt/CNTs +  $\text{Ce}(\text{OH})_4$ -*tert*-butylamine in 1.0 M KOH + 1.0  $\text{CH}_3\text{OH}$  with a scan rate of 20 mV/s.

## Reference

1. W. Huang, H. Wang, J. Zhou, J. Wang, P. N. Duchesne, D. Muir, P. Zhang, N. Han, F. Zhao, M. Zeng, J. Zhong, C. Jin, Y. Li, S. T. Lee and H. Dai, *Nat. Commun.*, 2015, **6**, 10035.
2. Q. He, Y. Shen, K. Xiao, J. Xi and X. Qiu, *Int. J. Hydrogen Energy*, 2016, **41**, 20709-20719.
3. C. Xu and P. K. Shen, *Chem. Commun.*, 2004, 2238-2239.
4. X. Yang, X. Wang, G. Zhang, J. Zheng, T. Wang, X. Liu, C. Shu, L. Jiang and C. Wang, *Int. J. Hydrogen Energy*, 2012, **37**, 11167-11175.
5. H. Zhang, W. Zhou, Y. Du, P. Yang, C. Wang and J. Xu, *Int. J. Hydrogen Energy*, 2010, **35**, 13290-13297.
6. C. Zhai, M. Zhu, D. Bin, H. Wang, Y. Du, C. Wang and P. Yang, *ACS Appl. Mater. Interfaces*, 2014, **6**, 17753-17761.
7. H. Huang and X. Wang, *Phys. Chem. Chem. Phys.*, 2013, **15**, 10367-10375.
8. K.-H. Ye, S.-A. Zhou, X.-C. Zhu, C.-W. Xu and P. K. Shen, *Electrochim. Acta*, 2013, **90**, 108-111.
9. Y.-Y. Feng, W.-Q. Kong, Q.-Y. Yin, L.-X. Du, Y.-T. Zheng and D.-S. Kong, *J. Power Sources*, 2014, **252**, 156-163.
10. L. Huang, Y. Han, X. Zhang, Y. Fang and S. Dong, *Nanoscale*, 2017, **9**, 201-207.
11. G. Zhang, Z. Yang, W. Zhang and Y. Wang, *J. Mater. Chem. A*, 2016, **4**,



- 3316-3323.
12. A. Serrà, E. Gómez, I. V. Golosovsky, J. Nogués and E. Vallés, *J. Mater. Chem. A*, 2016, **4**, 7805-7814.
  13. Q. Jiang, L. Jiang, S. Wang, J. Qi and G. Sun, *Catal. Commun.*, 2010, **12**, 67-70.
  14. Y.-Y. Feng, L.-X. Bi, Z.-H. Liu, D.-S. Kong and Z.-Y. Yu, *J. Catal.*, 2012, **290**, 18-25.
